# Supplementary material for: Thermally-induced desulfurization and conversion of guanidine thiocyanate into graphitic carbon nitride catalysts for hydrogen photosynthesis
Source: Royal Society of Chemistry journal article supplement (doi:10.1039/c3ta14339b), 2013-11-22
Supplement: c3ta14339b.pdf [file c3ta14339b.pdf]

## Supporting Information

### Thermally-induced Desulfurization and Conversion of Guanidine Thiocyanate into Graphitic Carbon Nitride Catalysts for Hydrogen Photosynthesis

Baihua Long, Jinliang Lin and Xinchun Wang\*

Research Institute of Photocatalysis Fujian Provincial Key Laboratory of Photocatalysis-State Key Laboratory Breeding Base and College of Chemistry and Chemical Engineering, Fuzhou University, Fuzhou 350002, P. R. China.  
Email:xcwang@fzu.edu.cn

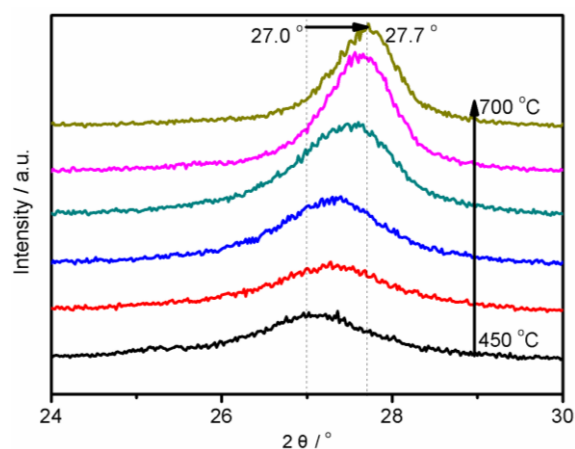

**Fig. S1** Enlarge view of XRD patterns in the range of 24-30 degree of GS-CN<sub>T</sub> obtained under different temperatures.

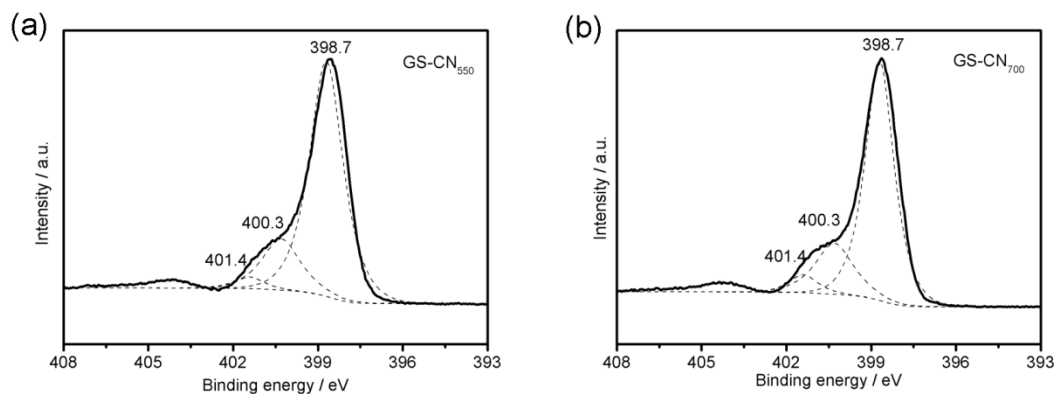

**Fig. S2** High-resolution N1s XPS spectra of (a) GS-CN<sub>550</sub> and (b) GS-CN<sub>700</sub> catalysts.

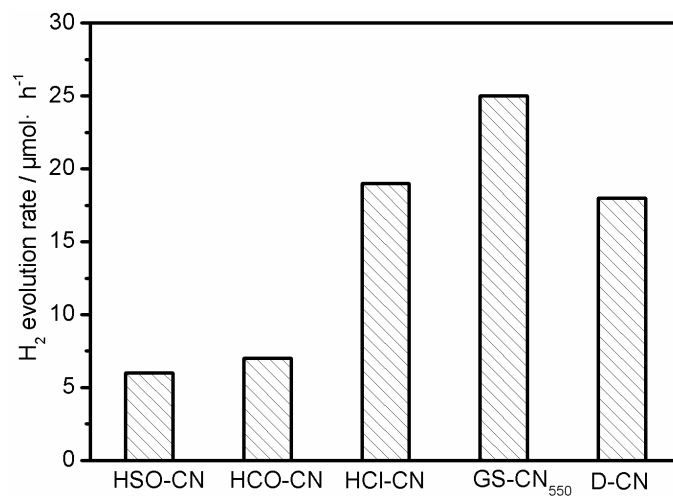

**Fig. S3** Rates of photocatalytic H<sub>2</sub> production over different catalysts.

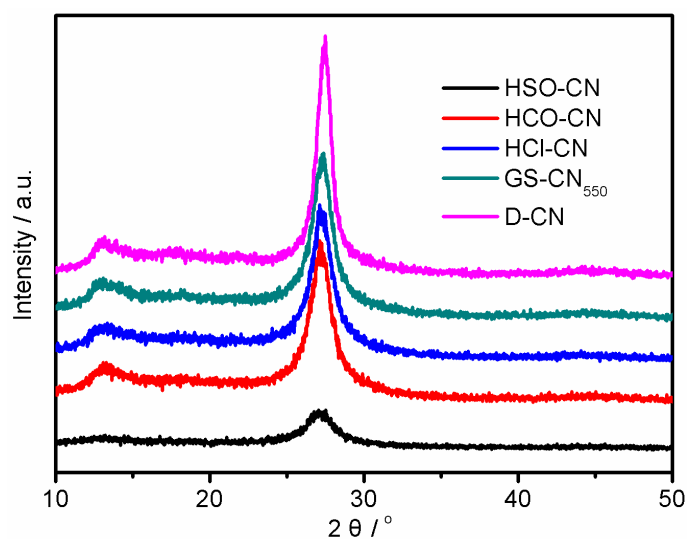

**Fig. S4** XRD patterns of materials obtained from different guanidine precursors together with the D-CN catalyst for comparison.

**Table S1** Elemental analysis results of the catalysts of GS-CN<sub>550</sub> and GS-CN<sub>700</sub>.

| Catalysts            | C cont. [wt. %] | N cont. [wt. %] | H cont. [wt. %] | S cont. [wt. %] | C/N atomic |
|----------------------|-----------------|-----------------|-----------------|-----------------|------------|
| GS-CN <sub>550</sub> | 34.86           | 61.02           | 1.794           | 0               | 0.67       |
| GS-CN <sub>700</sub> | 33.85           | 60.23           | 2.038           | 0               | 0.66       |
